# Supplementary material for: Medical-Grade Honey Enhances the Healing of Caesarean Section Wounds and Is Similarly Effective to Antibiotics Combined with Povidone-Iodine in the Prevention of Infections—A Prospective Cohort Study
Source: MDPI journal article supplement (doi:10.3390/antibiotics12010092), 2023-01-05
Supplement: s1 [file s1]

**Table S1:** Indication to perform a CS per study group. There were 383 patients per group, multiple indications per group are possible. The presented percentages represent the relative group of patients with a certain indication within the specified group[61].

| <b>Indication</b>                                | <b>Control group<br/>(Antibiotics +<br/>povidone-iodine)<br/>n, (%)</b> | <b>Treatment<br/>group<br/>(MGH)<br/>n, (%)</b> | <b>Total<br/>n, (%)</b> |
|--------------------------------------------------|-------------------------------------------------------------------------|-------------------------------------------------|-------------------------|
| Pre-eclampsia                                    | 88, (23)                                                                | 88, (23)                                        | 176, (23)               |
| Asherman's Syndrome (AS)/ Intrauterine adhesions | 74, (19.3)                                                              | 79, (20.6)                                      | 153, (20)               |
| Retroplacental hematoma, SHER Class II/IIIa [61] | 74, (19.3)                                                              | 73, (19.1)                                      | 147, (19.2)             |
| Eclampsia                                        | 54, (14.1)                                                              | 64, (16.7)                                      | 118, (15.4)             |
| Acute fetal distress                             | 46, (12.0)                                                              | 44, (11.6)                                      | 90, (11.7)              |
| Narrow pelvis                                    | 40, (10.4)                                                              | 37, (9.7)                                       | 77, (10.1)              |
| Abnormal fetal presentation                      | 41, (10.7)                                                              | 32, (8.4)                                       | 73, (9.5)               |
| Asherman's Syndrome (AS) + narrow pelvis         | 30, (7.8)                                                               | 24, (6.3)                                       | 54, (7.1)               |
| Chronic fetal distress                           | 16, (4.2)                                                               | 16, (4.2)                                       | 32, (4.2)               |
| Premature rupture of membranes                   | 11, (2.9)                                                               | 15, (3.9)                                       | 26, (3.4)               |
| Placenta previa hemorrhage                       | 7, (1.8)                                                                | 15, (3.9)                                       | 22, (2.9)               |
| Fetal macrosomia                                 | 6, (1.6)                                                                | 6, (1.6)                                        | 12, (1.6)               |
| Short birth interval + AS                        | 5, (1.3)                                                                | 6, (1.6)                                        | 11, (1.4)               |
| Heart disease                                    | 5, (1.3)                                                                | 1, (0.3)                                        | 6, (0.8)                |
| Severe arterial hypertension                     | 3, (0.8)                                                                | 1, (0.3)                                        | 4, (0.5)                |
| Umbilical cord prolapse                          | 0, (0)                                                                  | 4, (1)                                          | 4, (0.5)                |
| Myoma previa                                     | 1, (0.3)                                                                | 3, (0.8)                                        | 4, (0.5)                |
| Hydrocephalus                                    | 1, (0.3)                                                                | 3, (0.8)                                        | 4, (0.5)                |
| Acute lung edema                                 | 3, (0.8)                                                                | 0, (0)                                          | 3, (0.4)                |
| Nephropathy                                      | 3, (0.8)                                                                | 0, (0)                                          | 3, (0.4)                |
| AS + severe arterial hypertension                | 3, (0.8)                                                                | 0, (0)                                          | 3, (0.4)                |
| AS + post-term                                   | 0, (0)                                                                  | 3, (0.8)                                        | 3, (0.4)                |
| Sickle cell anemia                               | 3, (0.8)                                                                | 0, (0)                                          | 3, (0.4)                |
| Abnormal fetal heart rate                        | 3, (0.8)                                                                | 0, (0)                                          | 3, (0.4)                |
| Other                                            | 5, (1.3)                                                                | 3, (0.8)                                        | 8, (1)                  |

## Annex S1: Questionnaire

Q1). Date of entry: ...../...../.....

Q2). Study number: .....

Q3). Surname(s) and first name(s): .....

Q4). Tel: .....

Q5). Age: ..... years

Q6). Height: ..... cm

Q7). Weight: ..... kg

Q8). BMI: .....kg/ m<sup>2</sup>

Q9). Place of residence: ..... 1. Bamako 2. Outside of Bamako

Q10). Ethnic group: ..... 1. Bambara 2. Peulh 3. Sonrhaï 4. Malinké 5. Dogon 6. Other

Q11). Marital status: ..... 1. Married 2. Single 3. Divorced 4. Widowed

Q12). Profession: ..... 1. Housewife 2. Store employee 3. Government 4. Student 5. Other

Q13). Level of education: ..... 1. Primary 2. Secondary 3. Tertiary 4. No education 5.

Religious

Q14). Mode of admission: ..... 1. On own initiative 2. Referral

Q15). Reason for exclusion: .....

Q16). Medical background

Family history: ..... 1. Yes 2. No

o Arterial hypertension

o Diabetes

o Heart disease

o Asthma

o Epilepsy

o Sickle cell disease

o Other: .....

Medical history: ..... 1. Yes 2. No

o Arterial hypertension

o Diabetes

o Heart disease

o Asthma

o HIV

o Epilepsy

o Sickle cell disease

o Eclampsia

o Hepatitis B

o Other: .....

Surgical history: ..... 1. Yes 2. No

o Caesarean section

o Uterine rupture

- o Salpingectomy
- o Other(s): .....

Obstetric history: Gestation ..... Parity ..... Alive ..... Deceased ..... Aborted.....

Q17). Pregnancy age: ..... years

Q18). Number of prenatal consultations

Q19). Indication of Caesarean section

- o Pre-eclampsia
- o Asherman's Syndrome (AS)/ Intrauterine adhesions
- o Retroplacental hematoma, SHER Class II/IIIa
- o Eclampsia
- o Acute fetal distress
- o Narrow pelvis
- o Abnormal fetal presentation
- o Asherman's Syndrome (AS) + narrow pelvis
- o Chronic fetal distress
- o Premature rupture of membranes
- o Placenta previa hemorrhage
- o Fetal macrosomia
- o Short birth interval + AS
- o Heart disease
- o Severe arterial hypertension
- o Umbilical cord prolapse
- o Myoma previa
- o Hydrocephalus
- o Acute lung edema
- o Nephropathy
- o AS + severe arterial hypertension
- o AS + post-term
- o Sick cell anemia
- o Abnormal fetal heart rate
- o Other(s): .....

Q20). Type of anesthesia /...../ 1. General 2. Spinal anesthesia 3. Epidural

Q21). Presence of membrane during CS /...../ 1. Intact 2. Not intact

If not intact, time between rupture and Caesarean section ..... hours

Q22). Duration of Caesarean section ..... minutes

Q23). Suture type /...../ 1. Simple interrupted 2. Vertical mattress 3. Subcuticular

Q24). Postoperative medical treatment /...../ 1. Antibiotic therapy + local antiseptics 2. Medical grade honey

Q25). Duration of hospitalization ..... days

Q26). Duration of treatment ..... days

Q27). Duration of healing ..... days

Q28). Postoperative complications /...../ 1. Yes 2. No

If yes, type of complications:

- ☐ Pain at the surgical site
- ☐ Superficial pus discharge
- ☐ Deep pus discharge
- ☐ Curst formation
- ☐ Presence of wound exudate
- ☐ Peritonitis
- ☐ Endometritis
- ☐ Wound bleeding
- ☐ Other(s): .....

Q29). Fever /...../ 1. Yes 2. No

If yes, temperature ..... °C

Q30). Date of onset of fever postoperatively /...../ 1. Day 1 2. Day 2 3. Day 3 4. Day 4 5. Other: ....  
Day

Q31). Circumstances of onset of fever /...../ 1. Pus discharge 2. Bleeding 3. Redness/ heat 4.  
Other:.....

Q32). Pain /...../ 1. Yes 2. No

If yes, time of appearance ..... hours

Q33). Postoperative hemoglobin level ..... g/dl

Q34). Time to onset of complications ..... Days

Q35). Monitoring items

Other .....

Day 7

- ☐ Pain
- ☐ Fever
- ☐ Superficial pus discharge
- ☐ Deep pus discharge
- ☐ Wound bleeding
- ☐ Other(s): .....

Day 11

- ☐ Pain
- ☐ Fever
- ☐ Superficial pus discharge
- ☐ Deep pus discharge
- ☐ Wound bleeding
- ☐ Other(s): .....

Day 15

- ☐ Pain
- ☐ Fever
- ☐ Superficial pus discharge
- ☐ Deep pus discharge
- ☐ Wound bleeding
- ☐ Other(s): .....

Day 30

- ☐ Pain
- ☐ Fever
- ☐ Superficial pus discharge
- ☐ Deep pus discharge
- ☐ Wound bleeding
- ☐ Other(s): .....

Q36). Death /...../ 1. Yes 2. No

If yes, cause(s) .....

Time of occurrence of death ..... days
